1 **Phenanthrene contamination and ploidy level influence the rhizosphere**  
2 **microbiome of *Spartina***

3

4 Armand Cavé-Radet<sup>1</sup>, Cécile Monard<sup>1</sup>, Abdelhak El-Amrani<sup>1</sup>, Armel Salmon<sup>1</sup>, Malika  
5 Ainouche<sup>1</sup>, Étienne Yergeau<sup>2\*</sup>

6

7 <sup>1</sup>University of Rennes 1, CNRS/UMR 6553/OSUR, Ecosystems - Biodiversity - Evolution,  
8 35042 Rennes Cedex, France

9 <sup>2</sup>Institut national de la recherche scientifique, Centre Armand-Frappier Santé Biotechnologie,  
10 531 boulevard des Prairies, Laval, Québec, Canada

11

12

13 \*Corresponding author: [etienne.yergeau@iaf.inrs.ca](mailto:etienne.yergeau@iaf.inrs.ca)

14 **Abstract**

15 *Spartina* spp. are widely distributed salt marsh plants that have a recent history of  
16 hybridization and polyploidization. These evolutionary events have resulted in species with a  
17 heightened resilience to hydrocarbon contamination, which could make them an ideal model  
18 plant for the phytoremediation/reclamation of contaminated coastal ecosystems. However, it  
19 is still unknown if allopolyploidization events also resulted in differences in the plant  
20 rhizosphere-associated microbial communities, and if this could improve the plant  
21 phytoremediation potential. Here, we grew two parental *Spartina* species, their hybrid and the  
22 resulting allopolyploid in salt marsh sediments that were contaminated or not with  
23 phenanthrene, a model tricyclic PAH. The DNA from the rhizosphere soil was extracted and  
24 the bacterial 16S rRNA gene and ITS region were amplified and sequenced. Generally, both  
25 the presence of phenanthrene and the identity of the plant species had significant influences  
26 on the bacterial and fungal community structure, composition and diversity. In particular, the  
27 allopolyploid *S. anglica*, harbored a more diverse bacterial community in its rhizosphere, and  
28 relatively higher abundance of various bacterial and fungal taxa. Putative hydrocarbon  
29 degraders were significantly more abundant in the rhizosphere soil contaminated with  
30 phenanthrene, with the *Nocardia* genus being significantly more abundant in the rhizosphere  
31 of *S. anglica*. Overall our results are showing that the recent polyploidization events in the  
32 *Spartina* did influence the rhizosphere microbiome, both under normal and contaminated  
33 conditions, but more work will be necessary to confirm if these differences result in a higher  
34 phytoremediation potential.

35

36

37 **Importance**

38 Salt marshes are at the forefront of coastal contamination events caused by marine oil spills.  
39 Microbes in these environments play a key role in the natural attenuation of these  
40 contamination events, often in association with plant roots. One such plant is the *Spartina*,  
41 which are widely distributed salt marsh plants. Intriguingly, some species of the *Spartina*  
42 show heightened resistance to contamination, which we hypothesized to be due to differences  
43 in their microbiota. This was indeed the case, with the most resistant *Spartina* also showing  
44 the most different microbiota. A better understanding of the relationships between the  
45 *Spartina* and their microbiota could improve the coastal oil spill clean-up strategies and  
46 provide green alternatives to more traditional physico-chemical approaches.

47

48

## 49 **Introduction**

50 Polycyclic aromatic hydrocarbons (PAHs) are a group of ubiquitous organic pollutants, that  
51 are highly concerning in view of their potentially severe impact on natural ecosystems and  
52 public health. The remediation of sites contaminated by these compounds due to human  
53 activity, such as oil spill, is mainly carried out through excavation, soil leaching or various  
54 techniques based on microbial degradation (1, 2). Phytoremediation is an alternative low-cost  
55 and environmentally-friendly technology that uses plants and their associated microorganisms  
56 to remove pollutants from the environment. Phytoremediation exists under various flavors  
57 depending on the type of contaminant targeted and its fate (3). For instance, phytoextraction  
58 mainly concerns the extraction of inorganic pollutant from the soil and its translocation and  
59 accumulation in plant tissues. Volatile compounds can also be extracted from the soil by  
60 plants, and after translocation be released into the atmosphere during phytovolatilization.  
61 However, one of the most interesting form of phytoremediation is rhizodegradation, where  
62 plants stimulate a wide variety of root-associated bacteria and fungi (4) to degrade organic  
63 contaminants, often all the way to CO<sub>2</sub> (mineralization). Clearly, rhizodegradation is a plant-  
64 microbe joint venture. Close interactions between plants and soil microorganisms were  
65 reported to play a major role in detoxification and metabolization of xenobiotics (5, 6), and  
66 recent advances in ‘omics’ approaches now allow to address the plant-microbe complex in its  
67 entirety (7). Root exudates were demonstrated to have a central role, modifying the microbial  
68 PAH degraders community structure (8, 9) and significantly increasing microbial biomass  
69 (10). Rhizodegradation of PAH has even been suggested to be a model for understanding  
70 plant-microbe interactions (11).

71 One area of interest that is understudied is the use of phytoremediation for the cleanup of  
72 coastal salt marshes contaminated by hydrocarbons coming from seawater spills. In that  
73 context, *Spartina* is a particularly interesting genus, colonizing salt marshes all around the

74 world and providing key ecosystem services, while being particularly resilient to the effects of  
75 oil spills (12–15). This genus is also characterized by numerous hybridization and genome  
76 doubling events (polyploidy) (16), which are major evolutionary mechanisms for eukaryotes,  
77 and most specially for plants (17, 18). Recent work from our group has shown that this  
78 genome doubling increased tolerance to the model PAH phenanthrene in *S. anglica* as  
79 compared to its single-genome parents (19). Indeed, the genomic shock induced by the  
80 merging of divergent genomes results in massive shifts in genetic and epigenetic pathways,  
81 that may lead to the emergence of new adaptive phenotypes to environmental constraints (20).  
82 Although previous studies have shown a link between plant genotype and the rhizosphere  
83 microbial community structure and gene expression during phytoremediation (21, 22),  
84 nothing is known about the effects of genome doubling events on the roots associated  
85 microorganisms and their response to PAH contamination. Here, we hypothesized that the  
86 heightened resistance of polyploid *Spartina* species to PAH contaminants is partly related to  
87 concomitant shifts in the root-associated microorganisms. We selected four *Spartina* species:  
88 the parental species *Spartina alterniflora* ( $2n=6x=62$ ) and *S. maritima* ( $2n=6x=60$ ), their  
89 interspecific sterile hybrid *S. x townsendii* ( $2n=6x=62$ ) that appeared and emerged at the end  
90 of the 19<sup>th</sup> century and the allopolyploid derivative *S. anglica* that subsequently appeared  
91 following genome doubling ( $2n=12x=120, 122, 124$ ). These different *Spartina* species were  
92 grown in salt marsh sediments contaminated or not with phenanthrene, after which the  
93 bacterial 16S rRNA gene and fungal ITS region of the rhizosphere soil were amplified and  
94 sequenced.

## 95 **Material and methods**

### 96 *Plant and soil material*

97 Plants were collected in 2016 on their natural habitats along coastlines of France and England.  
98 For the parental species, *S. alterniflora* was sampled at Le Faou (Roadstead of Brest, France),  
99 whereas *S. maritima* was sampled in Brillac-Sarzeau and Le Hezo (Gulf of Morbihan,  
100 France). The homoploid hybrid *S. x townsendii*, which distribution range is not extended to  
101 France was collected in Hythe (Romney Marsh, England), and the allopolyploid *S. anglica*  
102 was sampled at La Guimorais (Saint-Coulomb, France), where bulk sediments (not associated  
103 with plants) were also collected. All the plants were acclimated in the La Guimorais  
104 sediments for three weeks before the start of the experiment. For the experiment, the  
105 remaining sediments were rinsed several times, dried and sieved through a 5mm sieve. To  
106 contaminate the soil, 150 g of air-dried sediment were either spiked with 45 mg of  
107 phenanthrene diluted in 10 mL of absolute ethanol, whereas the controls were spiked with 10  
108 mL of absolute ethanol. After total evaporation of ethanol for one day, these sediment  
109 samples were vigorously mixed by hand with an additional 150 g of air-dried sediment to  
110 reach a final concentration of 150 mg phenanthrene kg<sup>-1</sup> substrate for the contaminated  
111 treatment. The contaminated and the control soils were sampled at this step and kept at -20°C  
112 until DNA extraction.

113

### 114 *Experimental design*

115 Both polluted and control sediments were supplemented with sterile vermiculite before the  
116 start of the experiment (volume 1/3) for a better substrate breathability. Individual *Spartina*  
117 plants (four species) were then transplanted in pot containing 3 kg of treated or control  
118 substrates, and rhizomes were carefully placed into rhizobags of 3 cm of diameter, for a  
119 physical separation of the rhizosphere. The experimental design was replicated three times

120 resulting in a total of 24 pots that were placed in a phytotronic chamber with a light/dark  
121 regime of 16/8h, in an average ambient temperature of 20°C. Pots were watered with 200 mL  
122 of half-strength Hoagland's nutrient solution (23) every five days. After 60 days of growth,  
123 plants were uprooted and the rhizosphere soil (inside the rhizobags) was collected and stored  
124 at -20°C until DNA extraction.

125

### 126 *Bacterial 16S rRNA gene and fungal ITS amplification*

127 Genomic DNA from soil samples was extracted using a MoBio PowerSoil DNA extraction  
128 kit. Amplicons were prepared from total DNA by PCR targeting the bacterial 16S rRNA  
129 (forward: 515F: GTGCCAGCMGCCGCGGTAA and reverse: 806R:  
130 GGACTACHVGGGTWTCTAAT) (24) and fungi ITS (forward: ITS1F:  
131 CTTGGTCATTTAGAGGAAGTAA and reverse: 58A2R: CTGCGTTCTTCATCGAT) (25)  
132 specific primers. PCR amplification were performed in 25 µL final reaction volumes  
133 containing final concentrations of 1X KAPA HiFi HotSart ReadyMix, 0.4 mg.ml<sup>-1</sup> bovine  
134 serum albumin, 0.6 µM forward and reverse primers, and sterile water and 1 µL of DNA.  
135 PCR conditions were as followed: 5 min of initial denaturation (95°C), 25 cycles of 30s  
136 denaturation (95°C), 30s for primer annealing (55°C), and 45s elongation (72°C), followed by  
137 final extension for 10 min at 72°C. PCR amplicons were then purified using AMPure XP  
138 beads. Amplicon indexing was carried by a second PCR in 25 µL final reaction volumes  
139 containing 12.5 µL 2X KAPA HiFi HotSart ReadyMix, 2.5 µL of specific index primers 1  
140 and 2 from the Nextera Index kit, and 5 µL of purified amplicon. The second step PCR  
141 conditions were as followed: 3 min of initial denaturation (95°C), 8 cycles of 30s denaturation  
142 (95°C), 30s for primer annealing (55°C), and 45s elongation (72°C), followed by final  
143 extension for 5 min at 72°C. Index PCR cleanup was performed using AMPure XP beads.  
144 Finally, PCR amplicons were quantified using PicoGreen, normalized at 1 ng µl<sup>-1</sup>, pooled

145 together and sent for sequencing on an Illumina MiSeq (paired-end 2x250bp) at the McGill  
146 University and Genome Quebec Innovation Center (Montréal, Canada). Raw reads and  
147 associated metadata are available through NCBI BioProject accession PRJNA518897  
148 (<http://www.ncbi.nlm.nih.gov/bioproject/518897>).

149

#### 150 *Sequencing data processing*

151 Raw sequencing reads were processed using the mothur MiSeq Standard Operating Procedure  
152 (SOP) (26). The bacterial 16S rRNA gene and fungal ITS reads were processed separately.  
153 Bacterial paired-end reads were first assembled and contigs with ambiguous bases or smaller  
154 than 275 bp were excluded. Fungal paired reads were assembled, but because ITS amplicons  
155 have variable lengths, only the contigs with ambiguous bases were filtered out (no exclusion  
156 based on contig size). The dataset was dereplicated for faster computation, after which  
157 chimera were removed. Unique bacterial sequences were aligned using the SILVA nr  
158 database (v128) after which the aligned 16 rRNA gene and ITS sequences were clustered at  
159 97% sequence similarity, and singletons were removed from the analysis. Bacterial sequences  
160 were classified with the 16S rRNA PDS reference from Ribosomal Database Project (RDP  
161 version 16; 80% cut-off on bootstrap value for confidence taxonomic assignment) and  
162 undesirable taxonomic assigned sequences (chloroplast, mitochondria, unknown, Archaea and  
163 Eukaryota) were removed. Unique fungal sequences were classified with UNITE ITS  
164 database (99% singletons provided on [https://mothur.org/wiki/UNITE\\_ITS\\_database](https://mothur.org/wiki/UNITE_ITS_database); 80%  
165 cut-off) and undesirable taxonomic assigned sequences (unknown, Plantae and Protista) were  
166 removed. Misannotated fungal OTU (Operational Taxonomic Unit) corresponding to  
167 *Spartina* ITS sequences were identified using BLASTn (27) alignments on GenBank rDNA  
168 *Spartina* public data (best blast hit, min 90% identity and 80% query coverage) and removed  
169 from the analysis. Totals of 4,905,456 and 808,608 sequences were respectively assembled



170 from bacterial 16S rRNA gene and fungal ITS reads. Processing of bacterial 16S rRNA gene  
171 data resulted in 3,132,223 sequences, corresponding to 121,804 unique sequences that  
172 clustered into 28,092 OTUs. For the ITS sequences, we retained 785,825 sequences  
173 corresponding to 538,892 unique sequences that clustered into 10,550 OTUs. Total of 38  
174 misannotated OTUs corresponding to *Spartina* ITS sequences were removed from the  
175 analysis, resulting into 10,512 clean fungi OTUs.

176

### 177 *Statistical analyses*

178 Data and statistical analyses were performed in R (v 3.5.1). Indices of  $\alpha$ -diversity (inversed  
179 Simpson index) related to bacterial and fungal OTUs were calculated after normalization  
180 through random subsampling based on the size of the smallest library. Comparisons between  
181  $\alpha$ -diversity of microbial communities, the relative abundance of phyla and the relative  
182 abundance of selected putative hydrocarbon degraders according to the *Spartina* species and  
183 the treatments (polluted or control substrate) were conducted using ANOVA with post-hoc  
184 Tukey HSD tests (aov and tukeyHSD functions of the *stats* package). Principal coordinate  
185 analysis (PCoA) to describe  $\beta$ -diversity was performed on normalized OTU tables using  
186 Bray-Curtis dissimilarity index in the *vegan* (28) and *ape* (29) packages. Permanova testing  
187 the impact of *Spartina* species, treatments, and their interactions were conducted through 999  
188 permutations. Indicative species among OTUs were investigated using default parameters  
189 provided by the *indicspecies* package (30).

190

## 191 **Results**

### 192 *Bacterial and fungal diversity*

193 The presence of phenanthrene led to a general decrease of bacterial diversity in the  
194 rhizosphere of all the plant species (two-way ANOVA:  $F = 12.41$ ,  $P = 0.002$ ; Fig. 1a) but was  
195 only significant for *S. anglica* (pairwise tests; Fig. 1a). The two-way ANOVA also highlighted  
196 a significant effect of plant species on the bacterial diversity ( $F = 6.19$   $P = 0.005$ ), and Tukey  
197 HSD post-hoc tests showed that the rhizosphere of *S. anglica* was significantly more diverse  
198 than the rhizosphere of *S. alterniflora* and *S. maritima*. Pairwise tests confirmed this trend,  
199 with the bacterial diversity in the control rhizosphere of *S. anglica* being higher than in the  
200 control rhizosphere of *S. alterniflora* and in all contaminated rhizospheres (Fig. 1a). The  
201 interaction term Phenanthrene x Species did not have a significant effect on the bacterial  
202 diversity in two-way ANOVA tests. For fungi, phenanthrene contamination and the interaction  
203 term did not have a significant effect on the diversity in the rhizosphere in two-way ANOVA  
204 tests. However, plant species did have a significant effect on the fungal diversity in the  
205 rhizosphere ( $F = 11.20$ ,  $P < 0.001$ ), and Tukey HSD post-hoc test showed that *S. alterniflora*  
206 harbored a significantly more diverse fungal community in its rhizosphere as compared to the  
207 other three species (Fig. 1b).

208

### 209 *Bacterial and fungal community structure*

210 Principal coordinate analysis (PCoA) ordinations based on bacterial OTUs showed some level  
211 of clustering based on plant species and contamination (Fig. 2a). Permanova tests confirmed  
212 that *Spartina* species ( $F = 2.09$ ,  $P < 0.001$ ) and phenanthrene ( $F = 2.48$ ,  $P < 0.001$ ) had highly  
213 significant influences on the bacterial community structure, with a slightly stronger effect for  
214 contamination (higher F-ratio). For fungi, the PCoA ordination showed a relatively clearer  
215 picture than bacteria, with clustering of many treatments and a separation of most samples

216 based on the contamination treatment along the second axis (Fig. 2b). Permanova confirmed  
217 the slightly higher explanatory power of the contaminant treatment ( $F = 1.94$ ,  $P < 0.001$ ) as  
218 compared to the plant species ( $F = 1.67$ ,  $P < 0.001$ ). Nevertheless, both factors were highly  
219 significant, and even the interaction term was significant ( $F = 1.32$ ,  $P = 0.018$ ), suggesting  
220 that the contamination did not affect the rhizosphere fungal community structure in the same  
221 way for all plant species.

222

### 223 *Bacterial and fungal community composition*

224 The relative abundance of various dominant bacterial phyla in the rhizosphere of *Spartina*  
225 varied between the different plant species and between the contaminated and non-  
226 contaminated soils (Fig. 3). These shifts were not significant for the *Acidobacteria*, the  
227 *Actinobacteria*, the *Bacteroidetes*, and the *Alpha-*, *Beta-*, *Delta-* and *Epsilonproteobacteria*. In  
228 contrast, plant species significantly influenced the rhizosphere relative abundance of  
229 *Chloroflexi* ( $F = 6.21$ ,  $P = 0.05$ , significantly higher in the rhizosphere of *S. anglica* as  
230 compared to *S. alterniflora* and *S. x townsendii* in Tukey HSD tests), *Planctomycetes* ( $F=8.86$ ,  
231  $P=0.00108$ , significantly higher in the rhizosphere of *S. anglica* as compared to *S. alterniflora*  
232 and *S. x townsendii*, and in the rhizosphere of *S. maritima* vs. *S. alterniflora* in Tukey HSD  
233 tests) and total *Proteobacteria* ( $F = 4.54$ ,  $P = 0.02$ , significantly lower in the rhizosphere of *S.*  
234 *anglica* as compared to *S. alterniflora* and *S. x townsendii* in Tukey HSD tests). A significant  
235 effect of contamination was also observed for the *Chloroflexi* ( $F = 20.93$ ,  $P < 0.001$ ), total  
236 *Proteobacteria* ( $F = 14.23$ ,  $P = 0.002$ ), *Verrucomicrobia* ( $F = 4.85$ ,  $P = 0.43$ ) and  
237 *Gammaproteobacteria* ( $F = 11.39$ ,  $P = 0.004$ ). The genera *Sphingobacterium*, *Acinetobacter*,  
238 *Nocardia*, *Pseudomonas*, *Mycobacterium*, *Burkholderia*, *Bacillus*, *Sphingomonas*,  
239 *Rhodococcus*, *Paenibacillus*, *Massilia*, *Alcanivorax*, *Cycloclasticus* were singled out as  
240 putative hydrocarbon degraders based on a survey of the available literature. The summed

241 relative abundance of all these genera varied between around 2% to over 3% of all reads and  
242 was significantly higher in the rhizosphere of plants growing in contaminated soil ( $F = 8.43$ ,  $P$   
243  $= 0.01$ , Fig. 4), but showed no significant differences between plant species. For the  
244 individual genera, the relative abundance of *Paenibacillus*, *Bacillus*, *Burkholderia*,  
245 *Acinetobacter*, *Alcanivorax*, *Rhodococcus* and *Pseudomonas* did not vary significantly  
246 between the plant species and treatments. However, the relative abundances of *Sphingomonas*  
247 ( $F = 9.85$ ,  $P < 0.001$ , significantly higher in the rhizosphere of *S. x towsendii* as compared to  
248 all other species in Tukey HSD tests), *Sphingobacterium* ( $F = 5.41$ ,  $P = 0.009$ , significantly  
249 higher in the rhizosphere of *S. maritima* as compared to all other species in Tukey HSD tests),  
250 *Nocardia* ( $F = 7.56$ ,  $P = 0.002$ ; significantly higher in the rhizosphere of *S. anglica* as  
251 compared to all other species in Tukey HSD tests) showed significant differences between the  
252 rhizosphere of the different plant species. The relative abundances of *Massilia* ( $F = 17.54$ ,  $P <$   
253  $0.001$ ), *Cycloclasticus* ( $F = 4.96$ ,  $P = 0.04$ ) and *Mycobacterium* ( $F = 7.49$ ,  $P = 0.01$ ) were  
254 significantly affected by the phenanthrene treatment, with significantly higher relative  
255 abundance in the rhizosphere of plants growing in the contaminated soil (Fig. 4). In addition,  
256 the interaction term was significant for *Sphingobacterium* ( $F = 4.73$ ,  $P = 0.001$ ). Indicator  
257 species analyses confirmed some of the trends observed in ANOVA tests, as it identified  
258 bacterial OTUs related to *Massilia* and *Cycloclasticus* as the OTUs with the highest indicator  
259 power for contaminated rhizospheres (Table 1).

260 For fungi, the relative abundance of the three main phyla detected in the rhizosphere,  
261 varied between the plant species and the treatments (not shown). However, these trends were  
262 only significant for the *Basidiomycota*, where the plant species ( $F = 4.14$ ,  $P = 0.02$ ), the  
263 contamination treatment ( $F = 6.17$ ,  $P = 0.02$ ) and the interaction term ( $F = 4.62$ ,  $P = 0.02$ )  
264 were all significant. However, no fungal OTUs were identified as indicator of phenanthrene  
265 contamination.

## 266 **Discussion**

267 The hypothesis behind the present study was that the increased resilience of the allopolyploid  
268 *Spartina anglica* to hydrocarbon contamination was partly due to its root-associated microbial  
269 communities. The results partly confirmed this trend, as we found significant differences  
270 between the different *Spartina* species in terms of their bacterial and fungal community  
271 composition, structure and diversity. The allopolyploid *S. anglica* harbored a more diverse  
272 bacterial community, composed of relatively more *Nocardia*, *Chloroflexi* and *Planctomycetes*  
273 and less *Proteobacteria* in its rhizosphere as compared to its diploid parents and their hybrid.  
274 Previous studies from our group using willows have shown that the phylogeny of the host  
275 plant significantly influenced the fungal community composition, but only under high levels  
276 of contaminant (21). We also showed that the metatranscriptomic response of the rhizosphere  
277 microbial communities to contamination varied between different willow genotypes, and that  
278 this response was mirrored in the growth of the genotypes in contaminated soil (22).  
279 However, this is the first time, to our knowledge, that differences between the rhizosphere  
280 microbiome of recently naturally speciated plants are reported in the context of soil  
281 contamination. One particularly interesting aspect of these differences is the higher bacterial  
282 diversity in the rhizosphere of *S. anglica* as compared to the other plant species. Upon a  
283 contamination event, the plant-associated microbial diversity could have a central importance,  
284 as higher diversity generally results in functional redundancy, which would enable the  
285 microbiome to cope with a wider variety of environmental conditions while still providing  
286 essential services to the plant. Previous studies from our group have shown that the initial soil  
287 diversity explained better the difference in willow growth under highly contaminated  
288 conditions than diversity at the end of the experiment (31). It was further suggested that  
289 restoring microbial diversity of degraded environments could be the key for successful  
290 phytoremediation. Even though we cannot exclude the possibility that the higher diversity in

291 the rhizosphere of *S. anglica* is because the bulk soil used for the experiment was from a site  
292 where *S. anglica* predominantly grew, this link between the higher rhizosphere diversity and  
293 the increased resilience of *S. anglica* to contamination is intriguing and warrants further  
294 research.

295 The rhizosphere microbial communities of the four *Spartina* species tested showed many  
296 common responses to the presence of the contaminant. In the presence of PAH, salt marsh  
297 plants were reported to harbor different microbial communities, favoring PAH degrading  
298 microorganisms (32). Similarly, we found here that the general decrease in bacterial diversity  
299 under phenanthrene was concomitant to an increase in the relative abundance of putative PAH  
300 degraders, and more specifically for the genera *Mycobacterium*, *Cycloclasticus* and *Massilia*.  
301 These genera represent large bacterial groups that are able to metabolize and degrade PAH  
302 (33, 34) and are consistent with previous results about the PAH-degrading bacteria associated  
303 to *Spartina* in salt marshes (35, 36). Interestingly, *Cycloclasticus* spp. were often reported as  
304 one of the predominant PAH degraders in seawater (37, 38), whereas *Mycobacterium* are  
305 typical soil PAH degraders (39) and *Massilia* were found to degrade PAHs in soils or  
306 associated to roots (40, 41). This diversity of putative PAH degraders associated with the  
307 rhizosphere of *Spartina* is probably linked to the nature of its habitat, at the interface of  
308 terrestrial, plant and maritime ecosystems. These bacterial genera probably contain candidates  
309 of interest for salt marsh remediation, but their potential would have to be confirmed by other  
310 complementary methods.

311 We described here for the first time the root-associated microbiome of four *Spartina* species  
312 in a context of allopolyploidization and PAH contamination. Significant differences were  
313 observed between the plant species and between contaminated and control rhizospheres.  
314 Admittedly, shifts in the relative abundance and diversity of bacteria and fungi taxa might  
315 not be the only factor contributing to the increased resilience of *S. anglica* to contaminant

316 stress, and the shifts in the expression of specific genes or changes in the community size  
317 could be important and not captured by amplicon sequencing. More work would be required  
318 to confirm if the differences observed here are linked to the increased resilience of the  
319 allopolyploid species in the face of hydrocarbon contamination.

320

## 321 **Acknowledgements**

322 A.C.-R. was supported by an Erasmus+ mobility scholarship from the European Commission.  
323 This work was supported by the Ministère de l'Enseignement Supérieur et de la Recherche,  
324 by the CNRS, the Observatoire des Sciences et de l'Univers de Rennes (OSUR) and by a  
325 NSERC Discovery Grant (2014-05274 to EY). This research was enabled in part by support  
326 provided by Calcul Québec ([www.calculquebec.ca](http://www.calculquebec.ca)) and Compute Canada  
327 ([www.computecanada.ca](http://www.computecanada.ca)).

## 328 **References**

- 329 1. Wilson SC, Jones KC. 1993. Bioremediation of soil contaminated with polynuclear  
330 aromatic hydrocarbons (PAHs): A review. *Environ Pollut* 81:229–249.
- 331 2. Samanta SK, Singh OV, Jain RK. 2002. Polycyclic aromatic hydrocarbons:  
332 environmental pollution and bioremediation. *Trends Biotechnol* 20:243–248.
- 333 3. Pilon-Smits E. 2005. Phytoremediation. *Annu Rev Plant Biol* 56:15–39.
- 334 4. Ghosal D, Ghosh S, Dutta TK, Ahn Y. 2016. Current State of Knowledge in Microbial  
335 Degradation of Polycyclic Aromatic Hydrocarbons (PAHs): A Review. *Front Microbiol*  
336 7.
- 337 5. Oliveira V, Gomes NCM, Almeida A, Silva AMS, Simões MMQ, Smalla K, Cunha Â.  
338 2014. Hydrocarbon contamination and plant species determine the phylogenetic and  
339 functional diversity of endophytic degrading bacteria. *Mol Ecol* 23:1392–1404.
- 340 6. Amrani A El, Dumas A-S, Wick LY, Yergeau E, Berthome R. 2015.  
341 “Omics”; Insights into PAH Degradation toward Improved Green  
342 Remediation Biotechnologies. *Environ Sci Technol* 49:11281–11291.
- 343 7. Bell TH, Joly S, Pitre FE, Yergeau E. 2014. Increasing phytoremediation efficiency and  
344 reliability using novel omics approaches. *Trends Biotechnol* 32:271–280.
- 345 8. Cébron A, Louvel B, Faure P, France-Lanord C, Chen Y, Murrell JC, Leyval C. 2011.  
346 Root exudates modify bacterial diversity of phenanthrene degraders in PAH-polluted  
347 soil but not phenanthrene degradation rates: Root exudates modify phenanthrene  
348 degraders diversity. *Environ Microbiol* 13:722–736.



- 349 9. Rohrbacher F, St-Arnaud M. 2016. Root Exudation: The Ecological Driver of  
350 Hydrocarbon Rhizoremediation. *Agronomy* 6:19.
- 351 10. Esperschütz J, Pritsch K, Gattinger A, Welzl G, Haesler F, Buegger F, Winkler JB,  
352 Munch JC, Schlöter M. 2009. Influence of chronic ozone stress on carbon translocation  
353 pattern into rhizosphere microbial communities of beech trees (*Fagus sylvatica* L.)  
354 during a growing season. *Plant Soil* 323:85–95.
- 355 11. Correa-García S, Pande P, Séguin A, St-Arnaud M, Yergeau E. 2018. Rhizoremediation  
356 of petroleum hydrocarbons: a model system for plant microbiome manipulation. *Microb*  
357 *Biotechnol* 11:819–832.
- 358 12. Lin Q, Mendelsohn IA. 2012. Impacts and Recovery of the *Deepwater Horizon* Oil  
359 Spill on Vegetation Structure and Function of Coastal Salt Marshes in the Northern Gulf  
360 of Mexico. *Environ Sci Technol* 46:3737–3743.
- 361 13. Lin Q, Mendelsohn IA, Graham SA, Hou A, Fleeger JW, Deis DR. 2016. Response of  
362 salt marshes to oiling from the Deepwater Horizon spill: Implications for plant growth,  
363 soil surface-erosion, and shoreline stability. *Sci Total Environ* 557–558:369–377.
- 364 14. RamanaRao MV, Weindorf D, Breitenbeck G, Baisakh N. 2012. Differential Expression  
365 of the Transcripts of *Spartina alterniflora* Loisel (Smooth Cordgrass) Induced in  
366 Response to Petroleum Hydrocarbon. *Mol Biotechnol* 51:18–26.
- 367 15. Silliman BR, van de Koppel J, McCoy MW, Diller J, Kasozi GN, Earl K, Adams PN,  
368 Zimmerman AR. 2012. Degradation and resilience in Louisiana salt marshes after the  
369 BP-Deepwater Horizon oil spill. *Proc Natl Acad Sci* 109:11234–11239.

- 370 16. Ainouche ML, Fortune PM, Salmon A, Parisod C, Grandbastien M-A, Fukunaga K,  
371 Ricou M, Misset M-T. 2009. Hybridization, polyploidy and invasion: lessons from  
372 *Spartina* (Poaceae). *Biol Invasions* 11:1159–1173.
- 373 17. Wendel JF. 2000. Genome evolution in polyploids, p. 225–249. *In* Doyle, JJ, Gaut, BS  
374 (eds.), *Plant Molecular Evolution*. Springer Netherlands, Dordrecht.
- 375 18. Soltis DE, Albert VA, Leebens-Mack J, Bell CD, Paterson AH, Zheng C, Sankoff D, de  
376 Pamphilis CW, Wall PK, Soltis PS. 2009. Polyploidy and angiosperm diversification.  
377 *Am J Bot* 96:336–348.
- 378 19. Cavé-Radet A, Salmon A, Lima O, Ainouche ML, El Amrani A. 2019. Increased  
379 tolerance to organic xenobiotics following recent allopolyploidy in *Spartina* (Poaceae).  
380 *Plant Sci* 280:143–154.
- 381 20. Comai L. 2005. The advantages and disadvantages of being polyploid. *Nat Rev Genet*  
382 6:836–846.
- 383 21. Bell TH, El-Din Hassan S, Lauron-Moreau A, Al-Otaibi F, Hijri M, Yergeau E, St-  
384 Arnaud M. 2014. Linkage between bacterial and fungal rhizosphere communities in  
385 hydrocarbon-contaminated soils is related to plant phylogeny. *ISME J* 8:331–343.
- 386 22. Yergeau E, Tremblay J, Joly S, Labrecque M, Maynard C, Pitre FE, St-Arnaud M, Greer  
387 CW. 2018. Soil contamination alters the willow root and rhizosphere metatranscriptome  
388 and the root–rhizosphere interactome. *ISME J* 12:869–884.
- 389 23. Hoagland DR, Arnon DI. 1950. *The Water-Culture Method for Growing Plants without*  
390 *Soil*. California Agricultural Experiment Station.

- 391 24. Caporaso JG, Lauber CL, Walters WA, Berg-Lyons D, Huntley J, Fierer N, Owens SM,  
392 Betley J, Fraser L, Bauer M, Gormley N, Gilbert JA, Smith G, Knight R. 2012. Ultra-  
393 high-throughput microbial community analysis on the Illumina HiSeq and MiSeq  
394 platforms. *ISME J* 6:1621–1624.
- 395 25. Martin KJ, Rygielwicz PT. 2005. Fungal-specific PCR primers developed for analysis of  
396 the ITS region of environmental DNA extracts. *BMC Microbiol* 5:28.
- 397 26. Kozich JJ, Westcott SL, Baxter NT, Highlander SK, Schloss PD. 2013. Development of  
398 a Dual-Index Sequencing Strategy and Curation Pipeline for Analyzing Amplicon  
399 Sequence Data on the MiSeq Illumina Sequencing Platform. *Appl Environ Microbiol*  
400 79:5112–5120.
- 401 27. Camacho C, Coulouris G, Avagyan V, Ma N, Papadopoulos J, Bealer K, Madden TL.  
402 2009. BLAST+: architecture and applications. *BMC Bioinformatics* 10:421.
- 403 28. Dixon P. 2003. VEGAN, a package of R functions for community ecology. *J Veg Sci*  
404 14:927–930.
- 405 29. Paradis E, Claude J, Strimmer K. 2004. APE: Analyses of Phylogenetics and Evolution  
406 in R language. *Bioinformatics* 20:289–290.
- 407 30. Cáceres MD, Legendre P. 2009. Associations between species and groups of sites:  
408 indices and statistical inference. *Ecology* 90:3566–3574.
- 409 31. Yergeau E, Bell TH, Champagne J, Maynard C, Tardif S, Tremblay J, Greer CW. 2015.  
410 Transplanting Soil Microbiomes Leads to Lasting Effects on Willow Growth, but not on  
411 the Rhizosphere Microbiome. *Front Microbiol* 6.

- 412 32. Ribeiro H, Mucha AP, Almeida CMR, Bordalo AA. 2011. Hydrocarbon degradation  
413 potential of salt marsh plant–microorganisms associations. *Biodegradation* 22:729–739.
- 414 33. Kanaly RA, Harayama S. 2000. Biodegradation of High-Molecular-Weight Polycyclic  
415 Aromatic Hydrocarbons by Bacteria. *J Bacteriol* 182:2059–2067.
- 416 34. Johnsen AR, Wick LY, Harms H. 2005. Principles of microbial PAH-degradation in soil.  
417 *Environ Pollut* 133:71–84.
- 418 35. Daane LL, Harjono I, Zylstra GJ, Haggblom MM. 2001. Isolation and Characterization  
419 of Polycyclic Aromatic Hydrocarbon-Degrading Bacteria Associated with the  
420 Rhizosphere of Salt Marsh Plants. *Appl Environ Microbiol* 67:2683–2691.
- 421 36. Launen LA, Dutta J, Turpeinen R, Eastep ME, Dorn R, Buggs VH, Leonard JW,  
422 Haggblom MM. 2008. Characterization of the indigenous PAH-degrading bacteria of  
423 *Spartina* dominated salt marshes in the New York/New Jersey Harbor. *Biodegradation*  
424 19:347–363.
- 425 37. Tremblay J, Yergeau E, Fortin N, Cobanli S, Elias M, King TL, Lee K, Greer CW. 2017.  
426 Chemical dispersants enhance the activity of oil- and gas condensate-degrading marine  
427 bacteria. *ISME J* 11:2793–2808.
- 428 38. Yergeau E, Maynard C, Sanschagrín S, Champagne J, Juck D, Lee K, Greer CW. 2015.  
429 Microbial Community Composition, Functions, and Activities in the Gulf of Mexico 1  
430 Year after the Deepwater Horizon Accident. *Appl Environ Microbiol* 81:5855–5866.
- 431 39. Hennessee CT, Li QX. 2016. Effects of Polycyclic Aromatic Hydrocarbon Mixtures on  
432 Degradation, Gene Expression, and Metabolite Production in Four *Mycobacterium*  
433 Species. *Appl Environ Microbiol* 82:3357–3369.

- 434 40. Liu J, Liu S, Sun K, Sheng Y, Gu Y, Gao Y. 2014. Colonization on Root Surface by a  
435 Phenanthrene-Degrading Endophytic Bacterium and Its Application for Reducing Plant  
436 Phenanthrene Contamination. PLoS ONE 9:e108249.
- 437 41. Wang H, Lou J, Gu H, Luo X, Yang L, Wu L, Liu Y, Wu J, Xu J. 2016. Efficient  
438 biodegradation of phenanthrene by a novel strain *Massilia* sp. WF1 isolated from a  
439 PAH-contaminated soil. Environ Sci Pollut Res 23:13378–13388.

440 **Table 1.** Indicator bacterial OTUs for the phenanthrene-contaminated *Spartina* rhizospheres.

| <b>OTU</b> | <b>stat</b> | <b>p.value</b> | <b>Assigned genera</b>                  |
|------------|-------------|----------------|-----------------------------------------|
| Otu00188   | 0.998       | 0.001          | <i>Massilia</i>                         |
| Otu00140   | 0.996       | 0.001          | <i>Cycloclasticus</i>                   |
| Otu00370   | 0.991       | 0.001          | <i>Alcaligenaceae</i> unclassified      |
| Otu00552   | 0.989       | 0.049          | <i>Flavobacteriaceae</i> unclassified   |
| Otu02955   | 0.960       | 0.002          | <i>Salinirepens</i>                     |
| Otu01642   | 0.954       | 0.006          | <i>Sphingobium</i>                      |
| Otu02528   | 0.954       | 0.005          | <i>Alcaligenaceae</i> unclassified      |
| Otu01089   | 0.941       | 0.005          | <i>Peredibacter</i>                     |
| Otu04988   | 0.921       | 0.008          | unassigned                              |
| Otu03519   | 0.896       | 0.006          | <i>Gammaproteobacteria</i> unclassified |
| Otu08173   | 0.859       | 0.028          | unassigned                              |
| Otu02835   | 0.853       | 0.026          | unassigned                              |
| Otu04910   | 0.841       | 0.037          | <i>Bacteroidetes</i> unclassified       |

441

442

443

444 **Figure legends**

445 **Figure 1.** (A) Bacterial and (B) fungal diversity (inverse Simpson index) in the rhizosphere of  
446 four different *Spartina* species grown in phenanthrene-contaminated or control sediments.  
447 Values annotated by different letters are significantly different according to pairwise t-tests  
448 (Welch correction and Bonferroni adjusted,  $P < 0.05$ ).

449 **Figure 2.** Principal coordinate analysis (PCoA) for the (A) bacterial and (B) fungal  
450 communities of the rhizosphere of four different *Spartina* species grown in phenanthrene-  
451 contaminated or control sediments.

452 **Figure 3.** Relative abundance of the most represented bacterial phyla in the rhizosphere of  
453 four different *Spartina* species grown in phenanthrene-contaminated or control sediments.

454 **Figure 4.** Relative abundance of putative PAH-degrading bacteria genera in the rhizosphere  
455 of four different *Spartina* species grown in phenanthrene-contaminated or control sediments.

456

457

458

459 **Figure 1.**

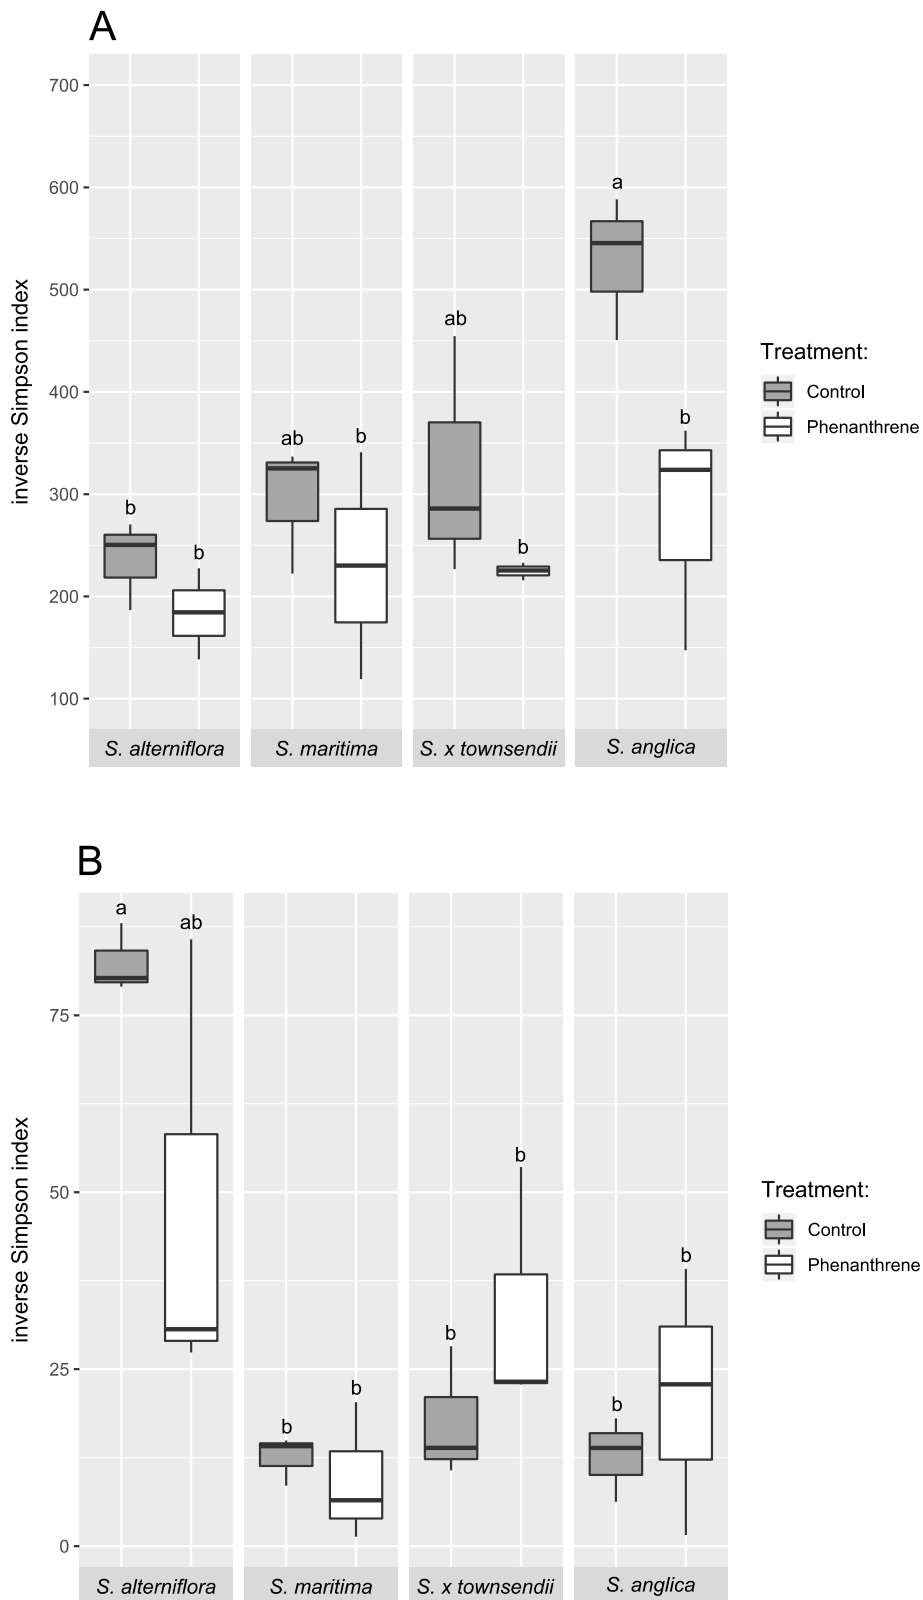

460

461

462



463 **Figure 2.**

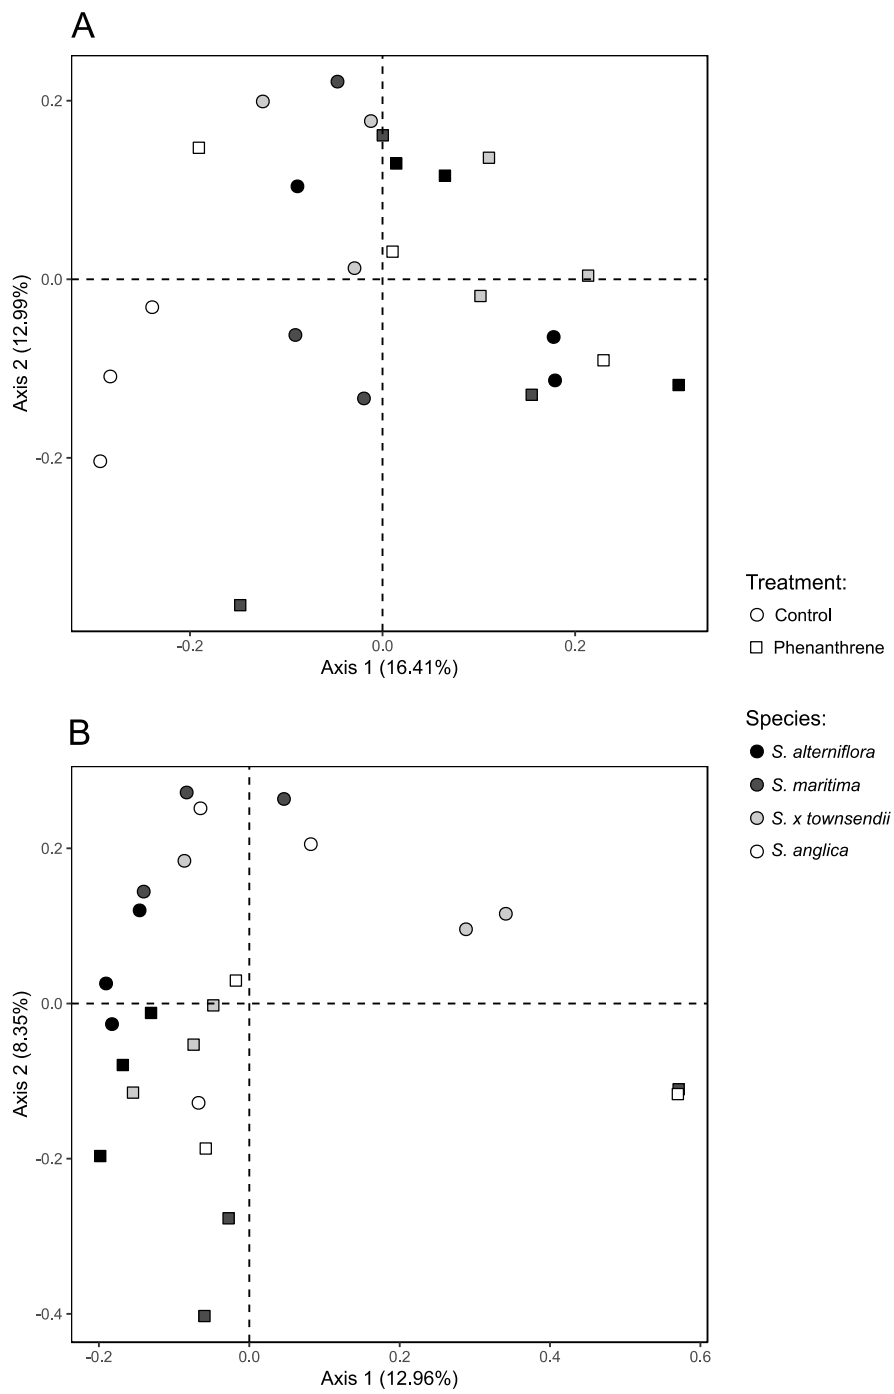

464

465

466

467 **Figure 3.**

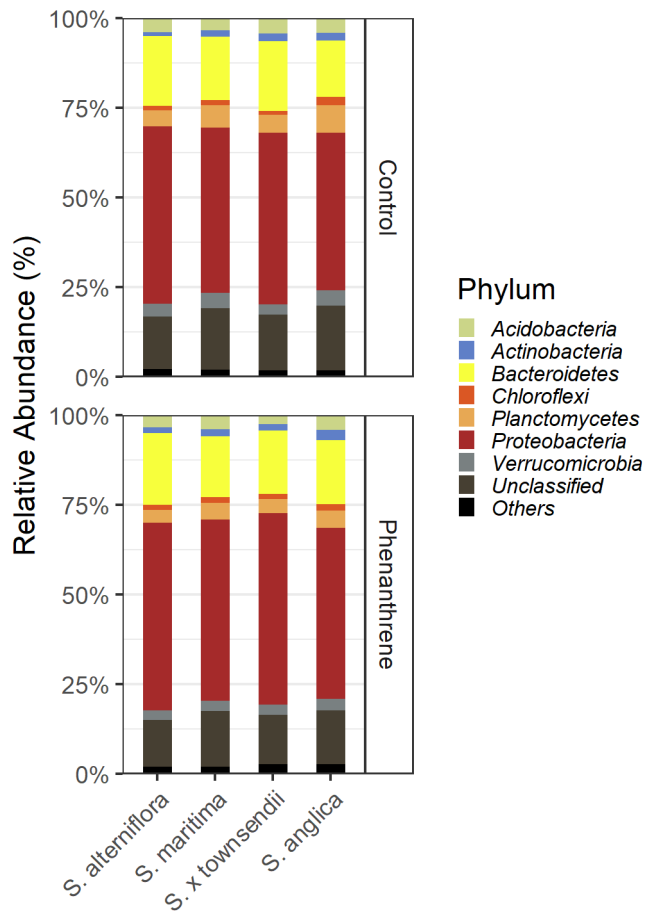

468

469

470

471 **Figure 4.**

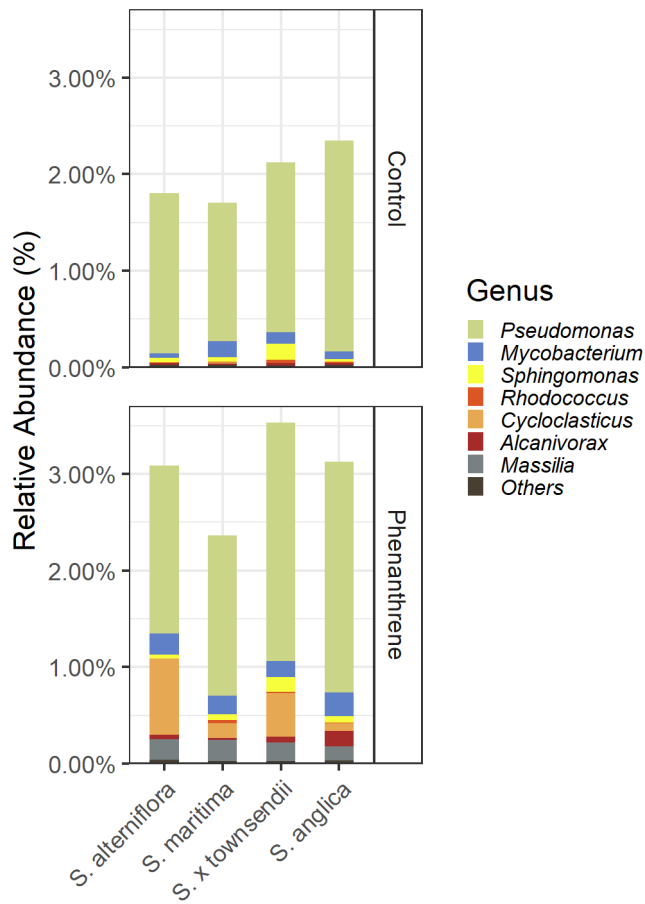

472

473

474
